# Supplementary material for: Prevalence and distribution of Gardnerella vaginalis subgroups in women with and without bacterial vaginosis
Source: Springer Nature journal article supplement (doi:10.1186/s12879-017-2501-y), 2017-06-05
Supplement: MOESM4 [file 12339260]

**Additional file 4.** Agreement between variuos gene-specific PCR tests employed to detect *G.vaginalis* in vaginal samples

| PCR assays                         | Kappa value (interpretation) |                                                                                                                                                                                                        |
|------------------------------------|------------------------------|--------------------------------------------------------------------------------------------------------------------------------------------------------------------------------------------------------|
| <i>vly</i> PCR vs 16S rRNA PCR     | Kappa=0.55<br>(moderate)     | Number of observed agreements: 83 (91.21% of the observations)<br>Number of agreements expected by chance: 73.1 (80.34% of the observations)<br>Standard error (SE) of kappa=0.14<br>95% CI: 0.28-0.87 |
| <i>vly</i> PCR vs <i>cpn60</i> PCR | Kappa=0.44<br>(moderate)     | Number of observed agreements: 71 (78.02% of the observations)<br>Number of agreements expected by chance: 55.4 (60.92% of the observations)<br>SE of kappa = 0.09<br>95% CI: 0.26-0.62                |
| <i>vly</i> PCR vs 23S rRNA PCR     | Kappa=0.23<br>(fair)         | Number of observed agreements: 54 (59.34% of the observations)<br>Number of agreements expected by chance: 42.9 (47.17% of the observations)<br>SE of kappa = 0.06<br>95%CI: 0.11-0.35                 |
| 16S rRNA PCR vs 23S rRNA PCR       | Kappa=0.15<br>(poor)         | Number of observed agreements: 50 (54.95% of the observations)<br>Number of agreements expected by chance: 42.6 (46.83% of the observations)<br>SE of kappa = 0.05<br>95%CI: 0.05-0.26                 |
| 16S rRNA PCR vs <i>cpn60</i> PCR   | Kappa=0.24<br>(fair)         | Number of observed agreements: 65 (71.43% of the observations)<br>Number of agreements expected by chance: 56.6 (62.23% of the observations)<br>SE of kappa = 0.09<br>95% CI: 0.07-0.41                |
| 23S rRNA PCR vs <i>cpn60</i> PCR   | Kappa=0.64<br>(good)         | Number of observed agreements: 74 (81.32% of the observations)<br>Number of agreements expected by chance: 44.5 (48.86% of the observations)<br>SE of kappa = 0.07<br>95% CI: 0.49-0.78                |
